# Supplementary material for: Evidence for GC-biased gene conversion as a driver of between-lineage differences in avian base composition
Source: PubMed Central journal article supplement (PMC4290106; doi:10.1186/s13059-014-0549-1), 2014-12-11

## Supplementary file 2

---

Given the pervasive effects of GC-biased gene conversion and correlation between GC content and 2nd codon positions, we might expect that life history is also associated with differences in amino acid usage between species due to the structure of the genetic code. This appears indeed to be the case for a subset of amino acids. Figures represent amino acid usage in percent plotted against  $\log(\text{body mass})$  in grams, with amino acids labelled in one-letter notation.  $\rho$  denotes Spearman's rank correlation coefficient.

**A (rho = -0.45 p = 0.0039)**

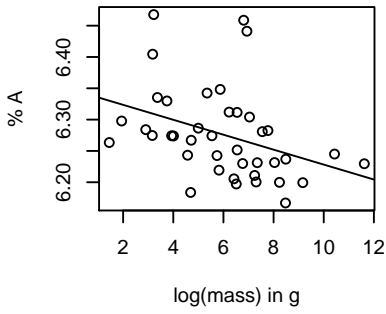

**R (rho = -0.35 p = 0.029)**

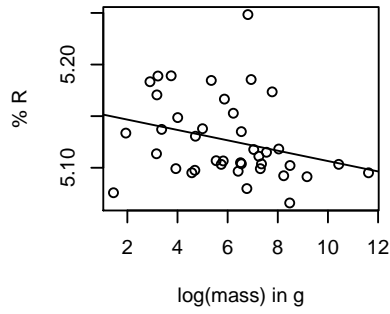

**N (rho = 0.63 p = 2.3e-05)**

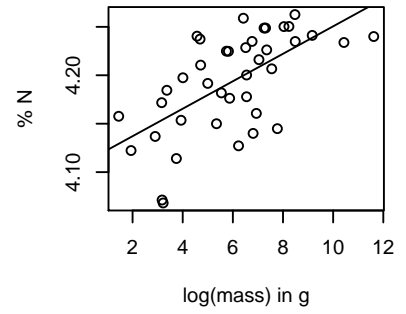

**D (rho = 0.47 p = 0.0024)**

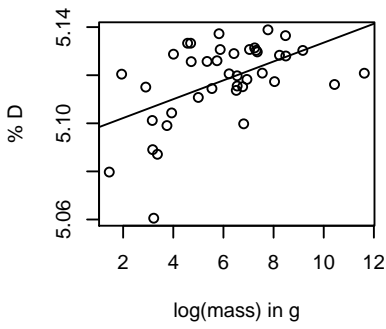

**C (rho = -0.39 p = 0.012)**

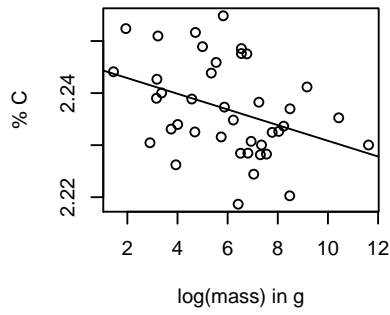

**E (rho = -0.44 p = 0.0049)**

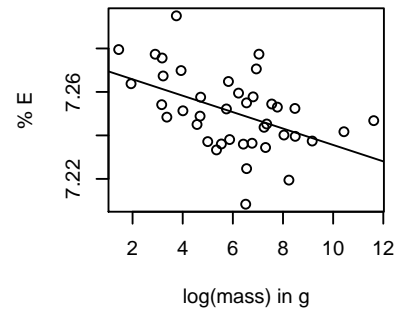

**Q (rho = -0.14 p = 0.38)**

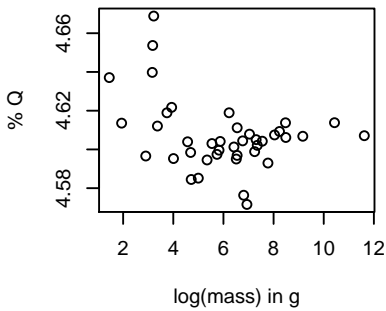

**G (rho = -0.5 p = 0.0011)**

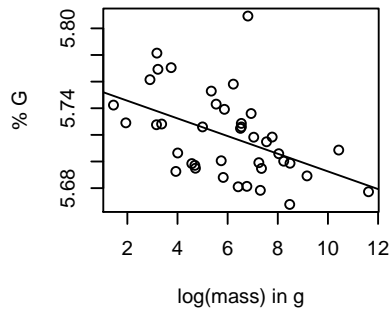

**H (rho = -0.55 p = 3e-04)**

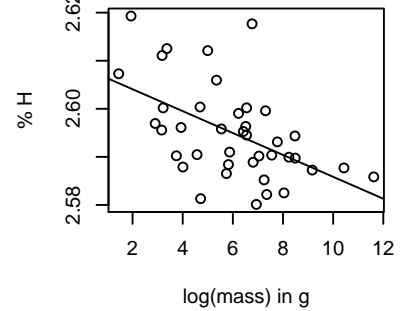

**I (rho = 0.62 p = 2.6e-05)**

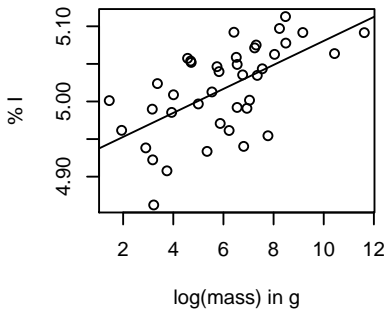

**L (rho = -0.52 p = 0.00066)**

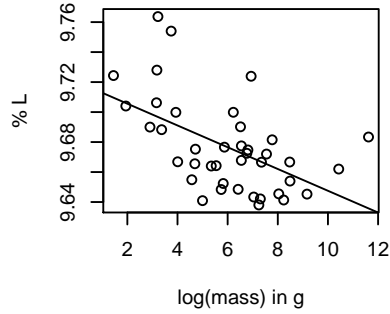

**K (rho = 0.55 p = 0.00028)**

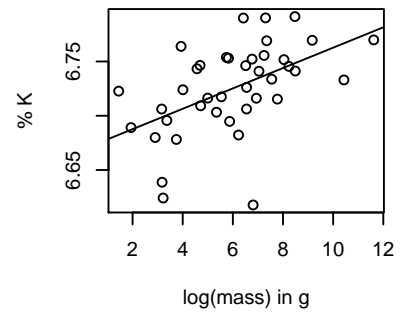

**M (rho = 0.33 p = 0.036)**

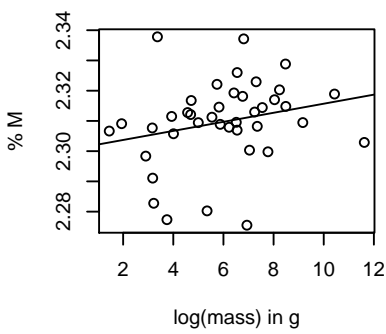

**F (rho = 0.44 p = 0.0045)**

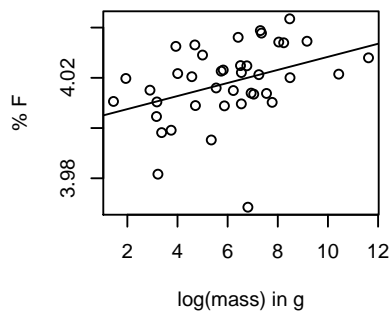

**P (rho = -0.57 p = 0.00016)**

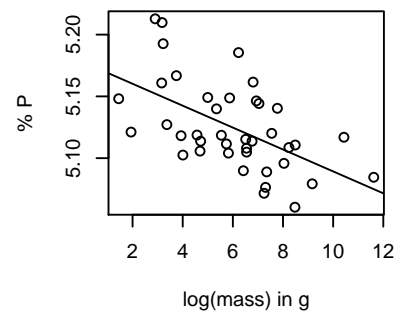

**S (rho = -0.37 p = 0.02)**

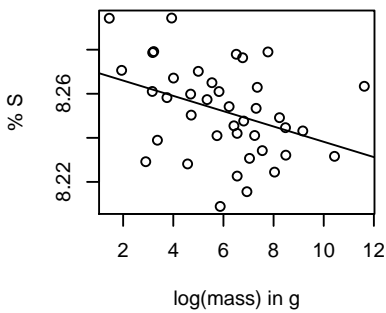

**T (rho = 0.49 p = 0.0015)**

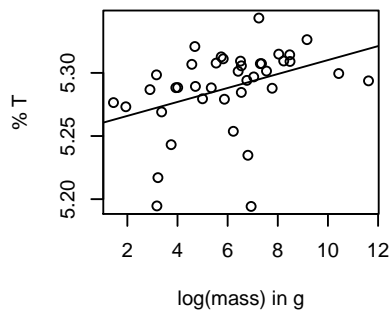

**W (rho = -0.19 p = 0.25)**

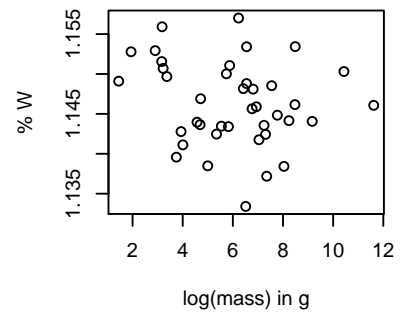

**Y (rho = 0.59 p = 9.5e-05)**

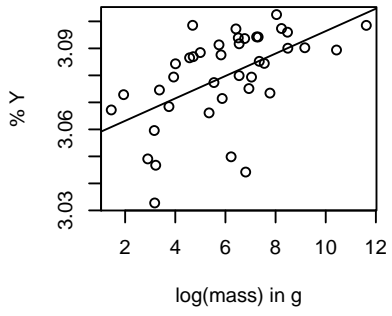

**V (rho = -0.36 p = 0.024)**

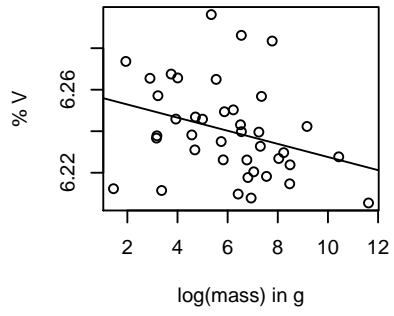

Supplement: 13059_2014_549_MOESM2_ESM.pdf [file 13059_2014_549_MOESM2_ESM.pdf]
