# Supplementary material for: Evidence for GC-biased gene conversion as a driver of between-lineage differences in avian base composition
Source: PubMed Central journal article supplement (PMC4290106; doi:10.1186/s13059-014-0549-1), 2014-12-11

## Supplementary file 6

---

Estimates of reconstructed ancestral age of first female sexual maturity for a given branch are highly correlated between Coevol chains run on different concatenated sequence alignments. Plots show pairwise correlations, with the x and y axes representing age of 1st maturity for the labelled alignment and rho denoting Spearman's rank correlation coefficient. These results indicate that the alignments were sufficiently long to give reproducible results.

**rho = 0.9531**

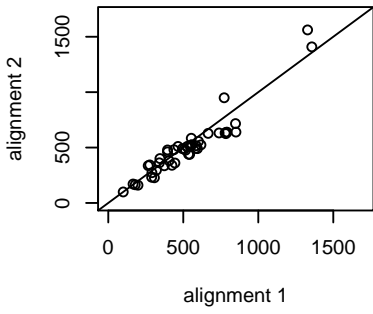

**rho = 0.9407**

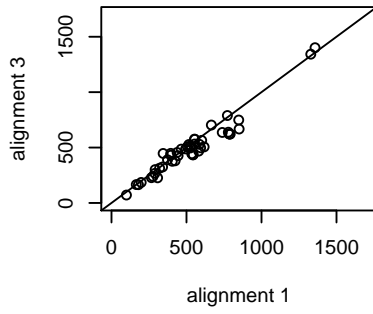

**rho = 0.9549**

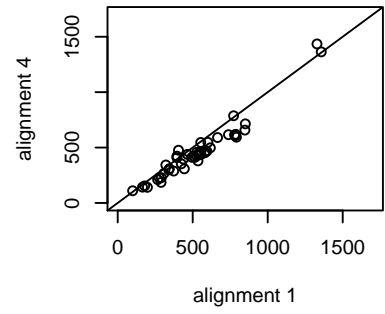

**rho = 0.9529**

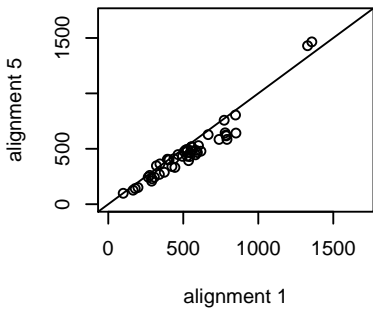

**rho = 0.9396**

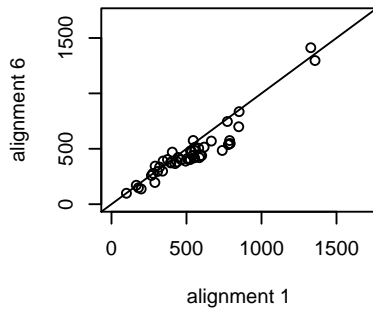

**rho = 0.9391**

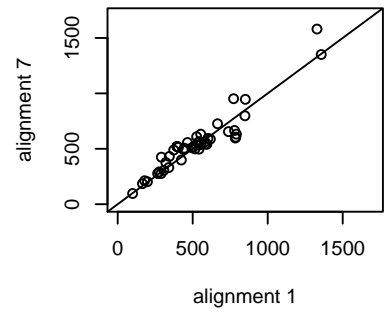

**rho = 0.9459**

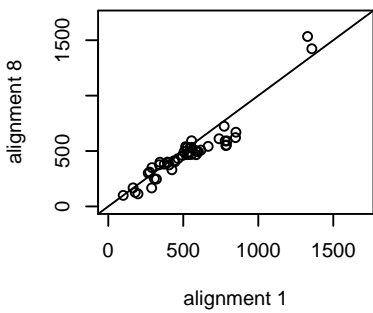

**rho = 0.9578**

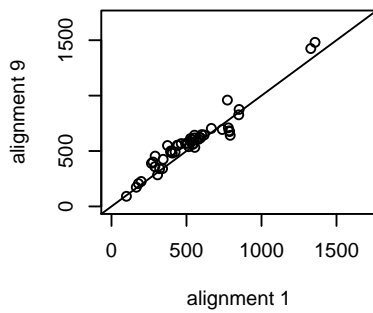

**rho = 0.9231**

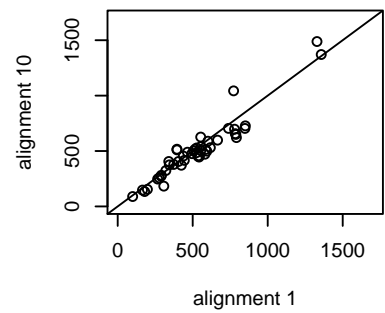

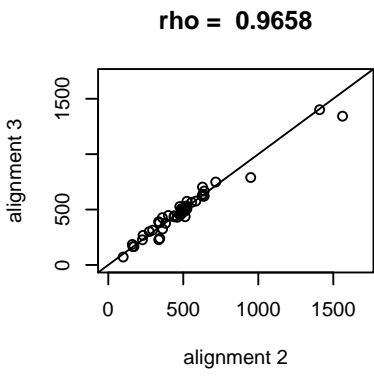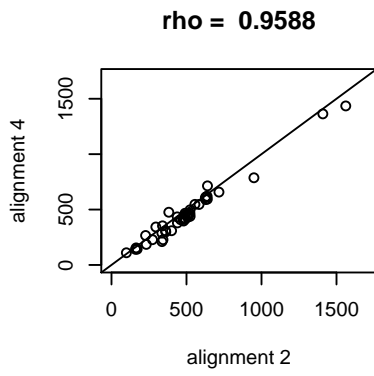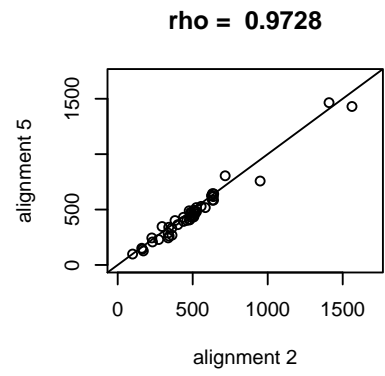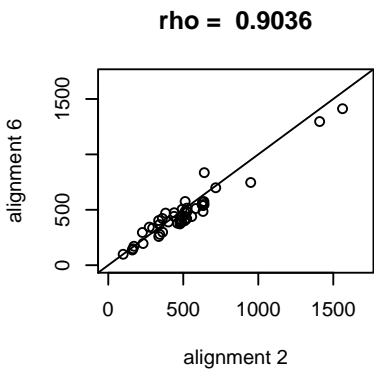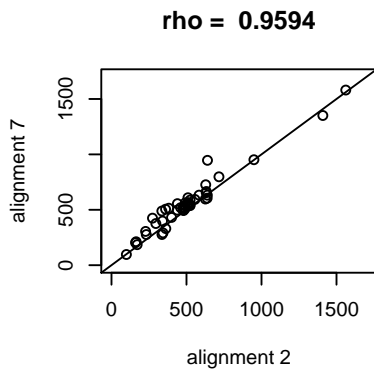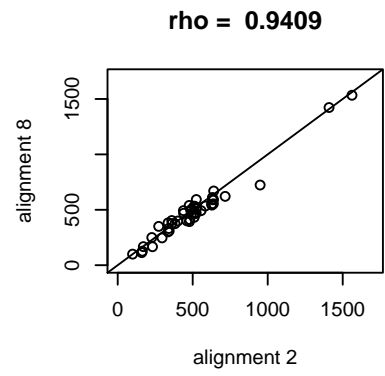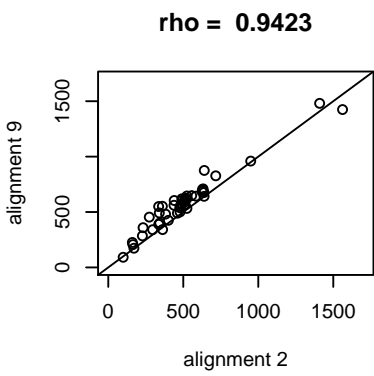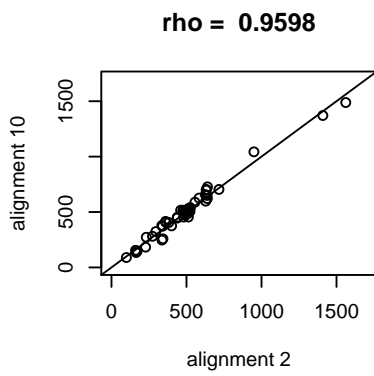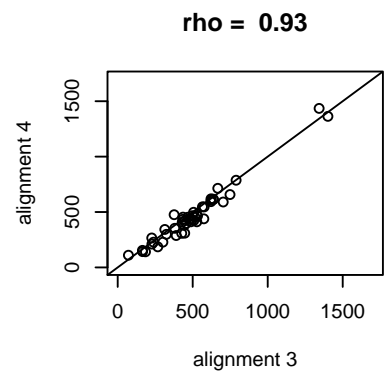

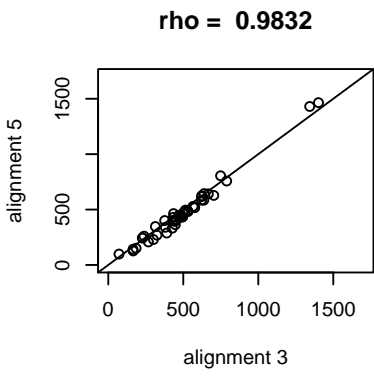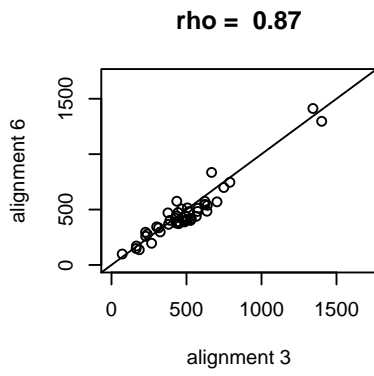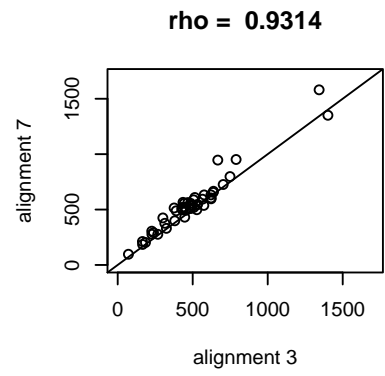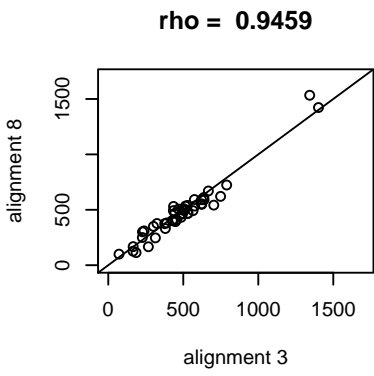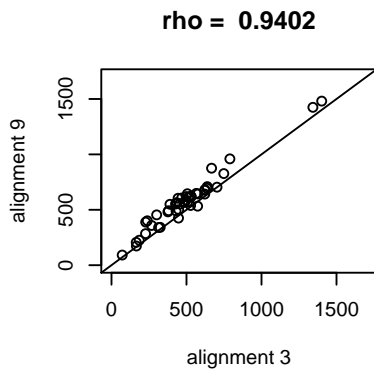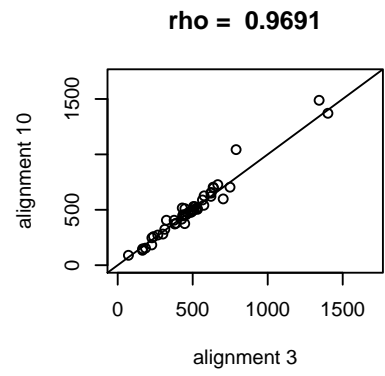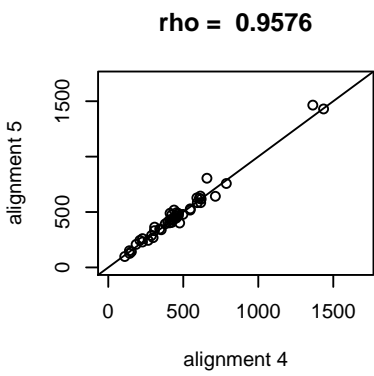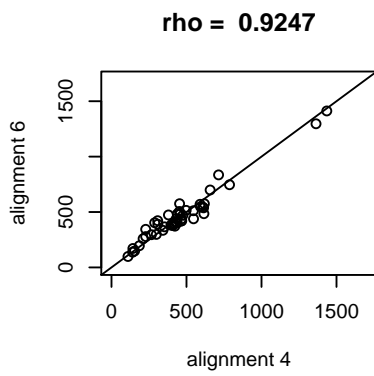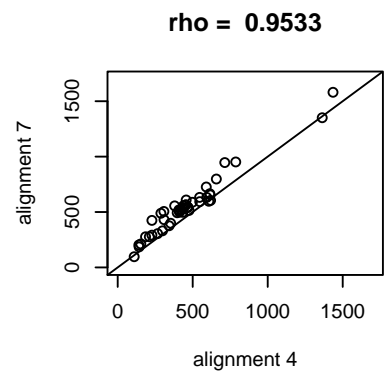

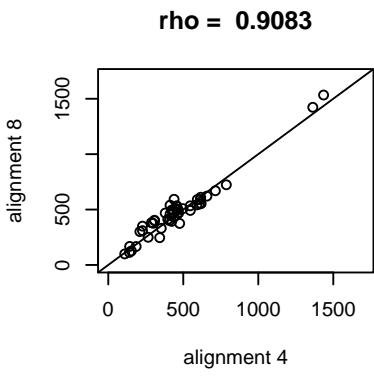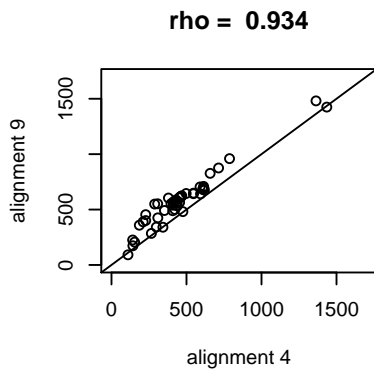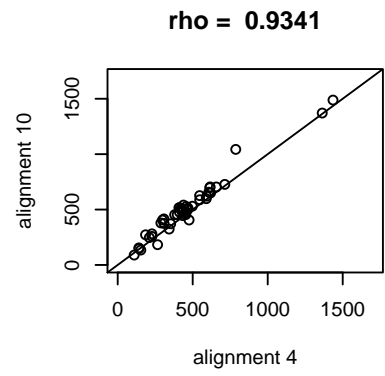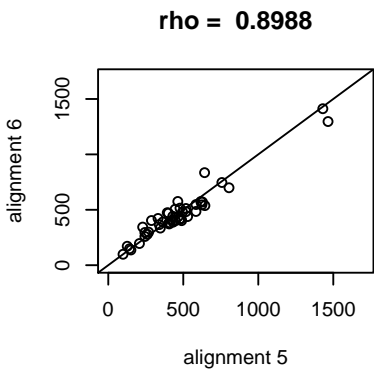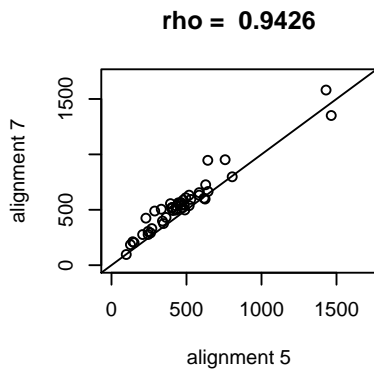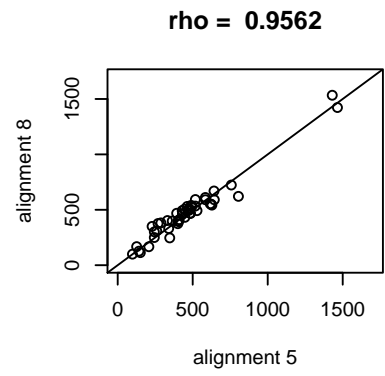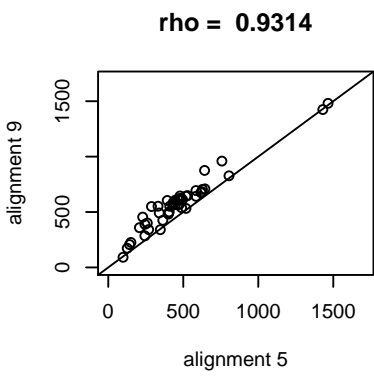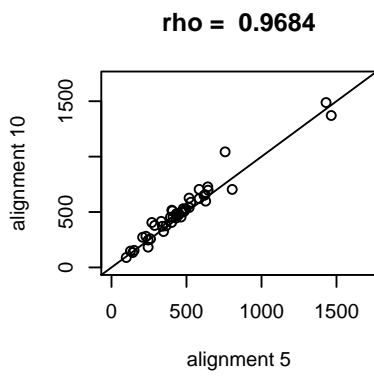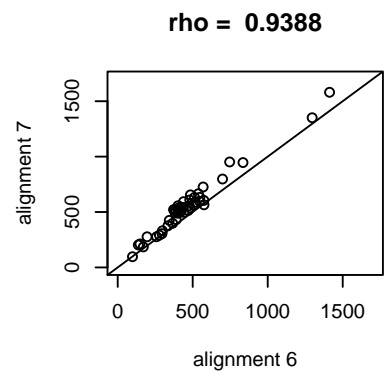

**rho = 0.9322**

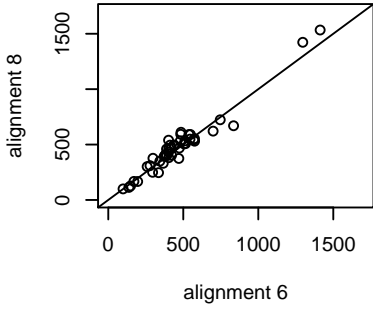

**rho = 0.9055**

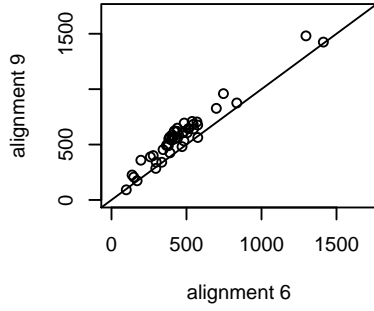

**rho = 0.8629**

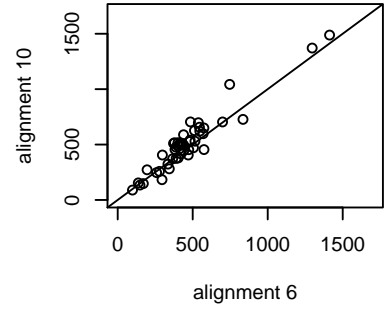

**rho = 0.9248**

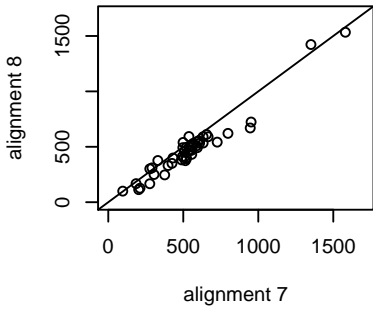

**rho = 0.9554**

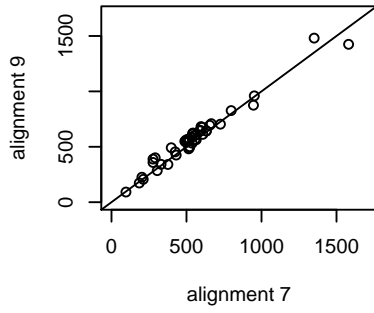

**rho = 0.9392**

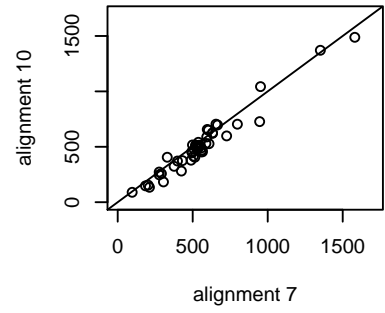

**rho = 0.9069**

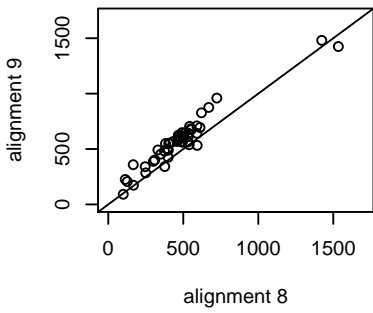

**rho = 0.9383**

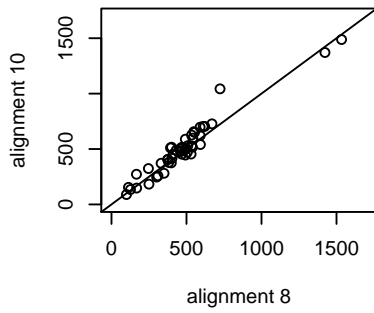

**rho = 0.9176**

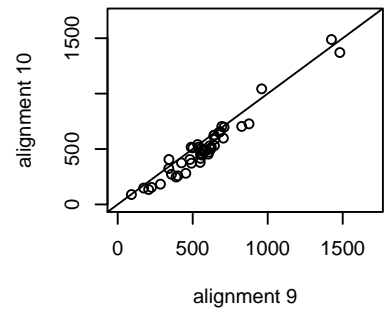

Supplement: 13059_2014_549_MOESM6_ESM.pdf [file 13059_2014_549_MOESM6_ESM.pdf]
