# Supplementary material for: Evidence for GC-biased gene conversion as a driver of between-lineage differences in avian base composition
Source: PubMed Central journal article supplement (PMC4290106; doi:10.1186/s13059-014-0549-1), 2014-12-11
Supplement: 13059_2014_549_MOESM4_ESM.pdf [file 13059_2014_549_MOESM4_ESM.pdf]

## Supplementary file 4

---

| Alignment | dS vs maturity |        | GC3 vs maturity |        |
|-----------|----------------|--------|-----------------|--------|
|           | correlation    | pp     | correlation     | pp     |
| 1         | -0.824         | 0      | -0.14           | 0.28   |
| 2         | -0.772         | 0      | -0.151          | 0.27   |
| 3         | -0.78          | 0      | -0.418          | 0.069  |
| 4         | -0.854         | 0      | -0.697          | 0.0004 |
| 5         | -0.777         | 0      | -0.588          | 0.0094 |
| 6         | -0.757         | 0      | -0.29           | 0.11   |
| 7         | -0.962         | 0      | -0.806          | 0.0054 |
| 8         | -0.79          | 0      | -0.434          | 0.036  |
| 9         | -0.721         | 0.0004 | -0.641          | 0.005  |
| 10        | -0.811         | 0      | -0.52           | 0.042  |

Results from 10 Coevol chains (see Materials and Methods) show negative correlations through time between age of 1st female sexual maturity (labelled "maturity") and dS, which was used to model trait evolution along the tree. They also show a negative relationship between GC3 and age of 1st female sexual maturity through time. Although not all alignments reached low posterior probabilities, this is consistent with our observation that small-bodied birds with short generation times and large populations tend to have higher GC3.
