# Supplementary material for: Evidence for GC-biased gene conversion as a driver of between-lineage differences in avian base composition
Source: PubMed Central journal article supplement (PMC4290106; doi:10.1186/s13059-014-0549-1), 2014-12-11
Supplement: 13059_2014_549_MOESM7_ESM.pdf [file 13059_2014_549_MOESM7_ESM.pdf]

## Supplementary file 7

| Species 1                      | Species 2                    |
|--------------------------------|------------------------------|
| <i>Meleagris gallopavo</i>     | <i>Gallus gallus</i>         |
| <i>Merops nubicus</i>          | <i>Picoides pubescens</i>    |
| <i>Apaloderma vittatum</i>     | <i>Buceros rhinoceros</i>    |
| <i>Leptosomus discolor</i>     | <i>Colius striatus</i>       |
| <i>Cathartes aura</i>          | <i>Haliaeetus albicilla</i>  |
| <i>Taeniopygia guttata</i>     | <i>Geospiza fortis</i>       |
| <i>Corvus brachyrhynchos</i>   | <i>Manacus vitellinus</i>    |
| <i>Melopsittacus undulatus</i> | <i>Nestor notabilis</i>      |
| <i>Falco peregrinus</i>        | <i>Cariama cristata</i>      |
| <i>Egretta garzetta</i>        | <i>Pelecanus crispus</i>     |
| <i>Nipponia nippon</i>         | <i>Phalacrocorax carbo</i>   |
| <i>Aptenodytes forsteri</i>    | <i>Pygoscelis adeliae</i>    |
| <i>Gavia stellata</i>          | <i>Fulmarus glacialis</i>    |
| <i>Eurypyga helias</i>         | <i>Phaethon lepturus</i>     |
| <i>Balearica regulorum</i>     | <i>Charadrius vociferus</i>  |
| <i>Calypte anna</i>            | <i>Chaetura pelagica</i>     |
| <i>Chlamydotis macqueenii</i>  | <i>Tauraco erythrolophus</i> |
| <i>Mesitornis unicolor</i>     | <i>Pterocles gutturalis</i>  |
| <i>Phoenicopterus ruber</i>    | <i>Podiceps cristatus</i>    |
